# Supplementary material
Source: PubMed Central journal article supplement (PMC2842050)
Supplement: 0910397107_pnas.200910397SI.pdf [file 0910397107_pnas.200910397SI.pdf]

# Supporting Information

Gläscher et al. 10.1073/pnas.0910397107

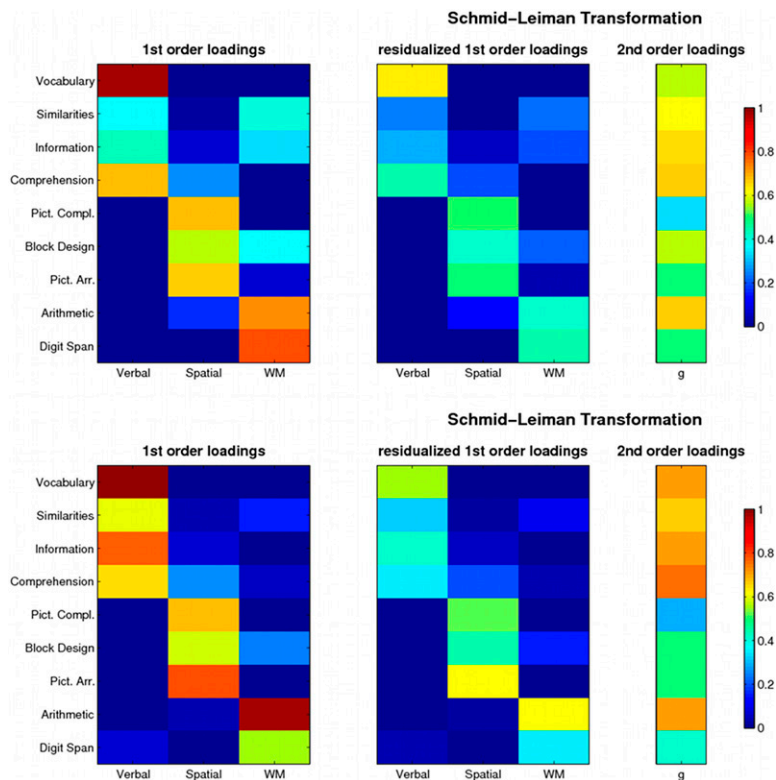

**Fig. S1.** Robustness of  $g$  extraction from incomplete data set. *Top:* Replication of Fig. 1 from the main text. Factors were extracted from 241 subjects, where missing data (see Table S2 for sample sizes) were replaced by the mean. *Bottom:* Same extraction of  $g$  and the first-order factors from a reduced sample of 117 subjects with complete data set on all Wechsler Adult Intelligence Scale (WAIS) subtests. The loading patterns between these two analyses are highly similar [similarity coefficient  $R_V = 0.92$  ( $Z = 14.24$ ,  $P < 0.001$ ); for details, see Abdi H (2007) RV coefficient and congruence coefficient. *Encyclopedia of Measurement and Statistics*, ed Salkind N (Sage, Thousand Oaks, CA), pp. 849-853], thus confirming that replacing missing data by the mean yields a robust estimate of  $g$  and our three first-order factors.

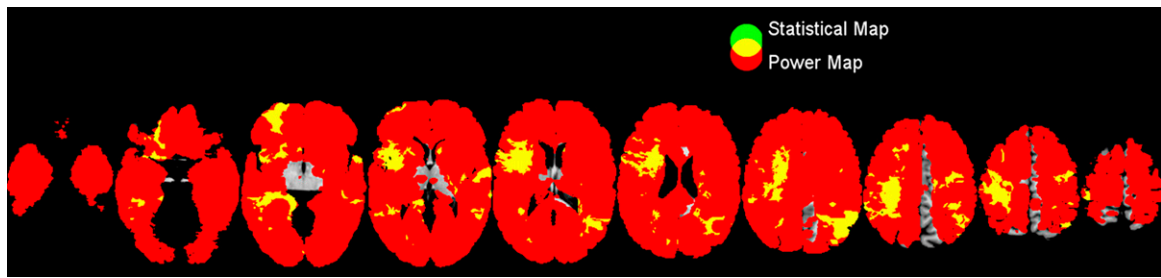

Fig. S2. Statistical power map (see *Materials and Methods* in main text for details on its computation). Areas in red indicate sufficient statistical power to detect a significant lesion–deficit relationship at a threshold of 5% false discovery rate. Areas in green show actual significant lesion–deficit relationship for the *g* factor scores at the same threshold. The overlap is shown in yellow.

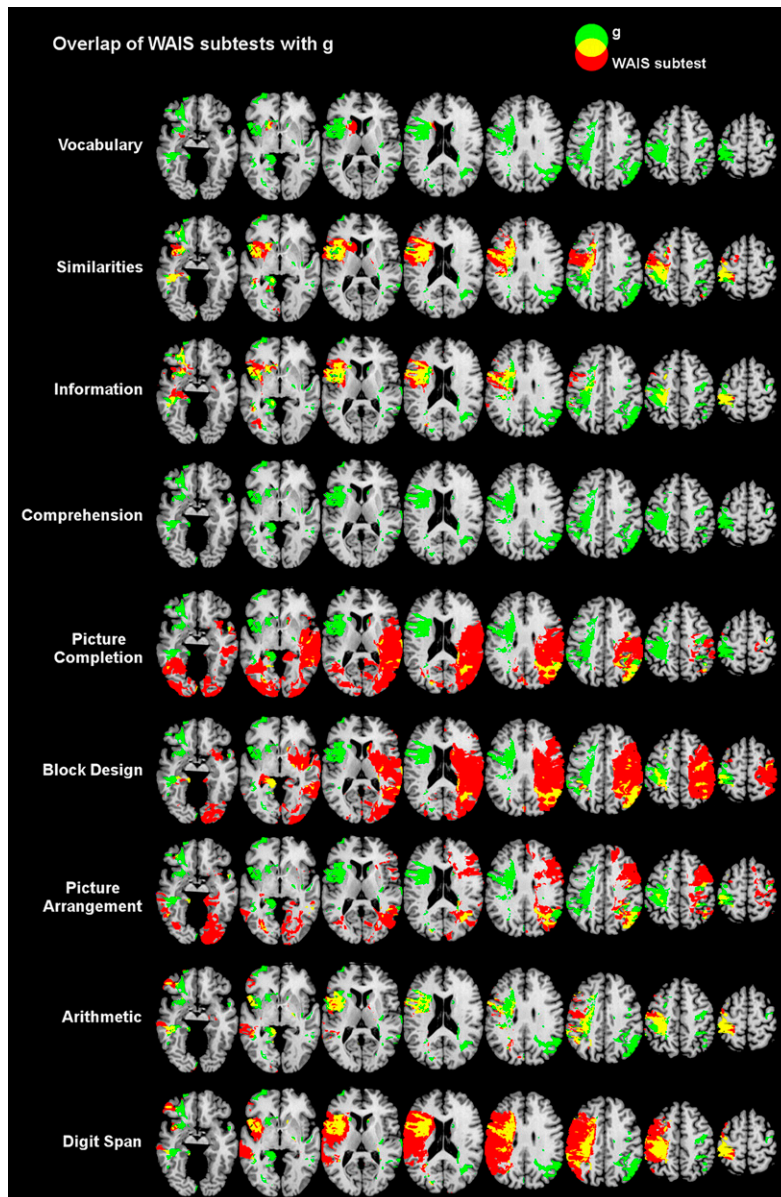

Fig. S3. Overlap (in yellow) of individual Wechsler Adult Intelligence Scale subtests (in red) with *g* (in green). Each statistical map is thresholded at 5% false discovery rate.

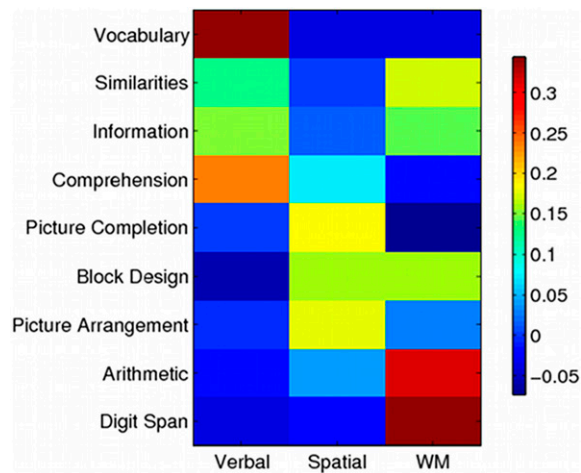

**Fig. 54.** Difference between the original factor solution (three promax-rotated factors using principal axis factoring) and the residualized first-order loadings after  $g$  has absorbed the common variance among (Schmid-Leiman transformation). The first-order loading of Vocabulary, Arithmetic, and Digit Span experience the largest attenuation.

**Table S1. Demographics, lesion volume, and etiology for 241 lesion patients**

| Etiology                    | <i>n</i> | Age (yr)    | Gender (female/male) | Education (yr) | Volume (mL) | Hand (left/right) |
|-----------------------------|----------|-------------|----------------------|----------------|-------------|-------------------|
| Cerebrovascular disease     | 188      | 52.4 (14.2) | 85/103               | 12.7           | 57.5 (63.3) | 20/168            |
| Anterior temporal lobectomy | 30       | 32.0 (10.3) | 16/14                | 13.5           | 43.5 (17.2) | 4/26              |
| Surgical intervention       | 16       | 45.6 (14.4) | 6/10                 | 13.3           | 67.9 (53.6) | 0/16              |
| Herpes simplex encephalitis | 3        | 38.0 (25.4) | 2/1                  | 13.8           | 127.2 (6.8) | 0/3               |
| Traumatic brain injury      | 4        | 21.3 (5.5)  | 1/3                  | 11.0           | 33.4 (17.6) | 0/4               |
| Overall                     | 241      | 48.8 (15.8) | 110/131              | 12.8           | 56.9 (58.6) | 24/217            |

Values are number or mean (SD).

**Table S2. Means, SDs, and sample sizes of all WAIS subtests**

| WAIS subtest             | <i>n</i> | Mean  | SD   |
|--------------------------|----------|-------|------|
| Vocabulary               | 125      | 9.49  | 2.97 |
| Similarities             | 211      | 9.42  | 2.71 |
| Information              | 223      | 9.58  | 2.96 |
| Comprehension            | 140      | 10.12 | 3.07 |
| Picture Completion       | 154      | 9.81  | 2.95 |
| Block Design             | 239      | 9.20  | 3.05 |
| Matrix Reasoning         | 84       | 10.45 | 2.98 |
| Picture Arrangement      | 204      | 9.00  | 2.82 |
| Arithmetic               | 227      | 9.46  | 3.00 |
| Digit Span               | 228      | 8.92  | 2.92 |
| Letter-Number Sequencing | 71       | 9.54  | 3.26 |
| Digit Symbol/Coding      | 224      | 8.27  | 2.87 |
| Symbol Search            | 72       | 9.85  | 3.04 |

**Table S3. Schmid-Leiman transformationa for 13 WAIS subtests**

| WAIS subtest             | Residualized first-order loadings |        |        |        |        |
|--------------------------|-----------------------------------|--------|--------|--------|--------|
|                          | <i>g</i>                          | VCI    | POI    | WMI    | PSI    |
| Vocabulary               | 0.501                             | 0.626  | -0.128 | -0.094 | 0.183  |
| Similarities             | 0.560                             | 0.395  | 0.090  | 0.146  | -0.158 |
| Information              | 0.583                             | 0.457  | 0.057  | 0.124  | -0.116 |
| Comprehension            | 0.660                             | 0.480  | 0.079  | -0.120 | 0.218  |
| Picture Completion       | 0.431                             | -0.017 | 0.368  | -0.180 | 0.009  |
| Block Design             | 0.631                             | -0.048 | 0.463  | 0.123  | -0.176 |
| Matrix Reasoning         | 0.333                             | -0.018 | 0.111  | 0.067  | 0.291  |
| Picture Arrangement      | 0.541                             | 0.034  | 0.369  | -0.030 | -0.061 |
| Arithmetic               | 0.617                             | 0.098  | 0.169  | 0.387  | 0.056  |
| Digit Span               | 0.465                             | -0.056 | -0.016 | 0.697  | 0.259  |
| Letter-Number Sequencing | 0.319                             | 0.047  | -0.140 | 0.246  | 0.666  |
| Digit Symbol/Coding      | 0.512                             | -0.036 | 0.278  | 0.170  | 0.061  |
| Symbol Search            | 0.365                             | 0.011  | 0.168  | -0.078 | 0.296  |
| % explained variance     | 26.321                            | 5.276  | 7.752  | 6.489  | 6.501  |

VCI, Verbal Comprehension Index; POI, Perceptual Organization Index; WMI, Working Memory Index; PSI, Processing Speed Index.

**Table S4. Schmid-Leiman transformation for 10 WAIS subtests**

| WAIS subtest         | Residualized first-order loadings |        |         |                |
|----------------------|-----------------------------------|--------|---------|----------------|
|                      | <i>g</i>                          | Verbal | Spatial | Working memory |
| Vocabulary           | 0.539                             | 0.649  | -0.102  | -0.040         |
| Similarities         | 0.619                             | 0.253  | 0.011   | 0.217          |
| Information          | 0.641                             | 0.321  | 0.026   | 0.173          |
| Comprehension        | 0.641                             | 0.481  | 0.177   | -0.041         |
| Picture Completion   | 0.345                             | 0.022  | 0.486   | -0.116         |
| Block Design         | 0.604                             | -0.105 | 0.431   | 0.178          |
| Picture Arrangement  | 0.505                             | 0.009  | 0.469   | 0.008          |
| Arithmetic           | 0.674                             | 0.006  | 0.107   | 0.363          |
| Digit Span           | 0.524                             | -0.075 | -0.074  | 0.444          |
| Digit Symbol/Coding  | 0.490                             | -0.035 | 0.249   | 0.177          |
| % explained variance | 32.035                            | 8.378  | 4.850   | 7.623          |

**Table S5. Schmid-Leiman transformation for 9 WAIS subtests (see main text)**

| WAIS subtest         | Residualized first-order loadings |        |         |        |
|----------------------|-----------------------------------|--------|---------|--------|
|                      | <i>g</i>                          | Verbal | Spatial | WM     |
| Vocabulary           | 0.573                             | 0.640  | -0.105  | -0.052 |
| Similarities         | 0.614                             | 0.236  | 0.012   | 0.225  |
| Information          | 0.656                             | 0.284  | 0.047   | 0.193  |
| Comprehension        | 0.661                             | 0.442  | 0.192   | -0.024 |
| Picture Completion   | 0.336                             | 0.007  | 0.500   | -0.096 |
| Block Design         | 0.572                             | -0.105 | 0.421   | 0.207  |
| Picture Arrangement  | 0.495                             | -0.009 | 0.486   | 0.036  |
| Arithmetic           | 0.671                             | -0.029 | 0.117   | 0.410  |
| Digit Span           | 0.497                             | -0.072 | -0.069  | 0.444  |
| % explained variance | 32.836                            | 8.425  | 5.658   | 8.134  |
